# Supplementary material for: Demography and predatory potential of Orius strigicollis on eggs of Plutella xylostella at two temperatures
Source: PeerJ. 2024 Oct 10;12:e18044. doi: 10.7717/peerj.18044 (PMC11471147; doi:10.7717/peerj.18044)
Supplement: Supplemental Information 1 [file peerj-12-18044-s001.xlsx]

## Sheet: Adult mean and totaldaily 28
Rep	a	b			Statistix 8.1 12/5/2019, 8:58:00 PM							Statistix 8.1 12/5/2019, 8:58:27 PM
1	11	88
2	10.75	86			One-Way AOV for: a b							Tukey HSD All-Pairwise Comparisons Test
3	11.7143	82
4	11.1429	78			Source DF SS MS F P							Variable Mean Homogeneous Groups
5	11	66			Between 1 48664.0 48664.0 92.1 0.0000							b 68.161 A
6	10.1667	61			Within 60 31713.7 528.6							a 12.129 B
7	10.8	54			Total 61 80377.7
8	13.25	53										Alpha 0.05 Standard Error for Comparison 5.8396
9	12.25	49			Grand Mean 40.145 CV 57.27							Critical Q Value 2.828 Critical Value for Comparison 11.676
10	15	30			Chi-Sq DF P							All 2 means are significantly different from one another.
11	10.5	21			Bartlett's Test of Equal Variances 144 1 0.0000
12	11.5	23			Cochran's Q 0.9981
13	13	117			Largest Var / Smallest Var 532.15
14	13.4444	121
15	13.125	105			Component of variance for between groups 1552.76
16	14.125	113			Effective cell size 31.0
17	12	96
18	13.25	106			Variable Mean						a=Mean	12.129
19	13.5714	95			a 12.129						b=total	68.161
20	14.2857	100			b 68.161
21	12.2857	86			Observations per Mean 31
22	13.8571	97			Standard Error of a Mean 4.1292
23	10.7143	75			Std Error (Diff of 2 Means) 5.8396
24	11.7143	82
25	12	60
26	10	40
27	12	36
28	10.3333	31
29	11	22
30	14.5	29
31	11	11
32
33
34
35
36
37
38
39
40
41
42
43
44
45
46
47
48
49
50
51
52
53
54
55
56
57
58
59
60
61
62
63
64
65
66
67
68
69
70
71
72
73
74
75
76
77
78
79
80
81
82
83
84
85
86
87
88
89
90
91
92
93
94
95
96
97
98
99
100
101
102
103
104
105
106
107
108

## Sheet: Adult mean and total 32
Rep	a	b		Statistix 8.1 12/5/2019, 9:02:03 PM							Statistix 8.1 12/5/2019, 9:02:22 PM
1	14.7143	103
2	16.1667	97		One-Way AOV for: a b							Tukey HSD All-Pairwise Comparisons Test
3	18.4	92
4	12.5	50		Source DF SS MS F P							Variable Mean Homogeneous Groups
5	11.75	47		Between 1 14051.0 14051.0 28.9 0.0000							b 44.152 A
6	14.5	58		Within 64 31115.2 486.2							a 14.970 B
7	14.5	58		Total 65 45166.3
8	16.5	66									Alpha 0.05 Standard Error for Comparison 5.4282
9	10.6667	32		Grand Mean 29.561 CV 74.59							Critical Q Value 2.824 Critical Value for Comparison 10.840
10	14	14		Chi-Sq DF P							All 2 means are significantly different from one another.
11	17	17		Bartlett's Test of Equal Variances 98.2 1 0.0000
12	25	25		Cochran's Q 0.9888
13	20	20		Largest Var / Smallest Var 88.163
14	16	16
15	17	17		Component of variance for between groups 411.057
16	13	13		Effective cell size 33.0							a=mean	14.97
17	15	103									b=total	44.152
18	13.6667	97		Variable Mean
19	12.3333	92		a 14.970
20	14	50		b 44.152
21	12	47		Observations per Mean 33
22	12	58		Standard Error of a Mean 3.8383
23	14.6667	58		Std Error (Diff of 2 Means) 5.4282
24	15.3333	66
25	14.3333	32
26	16	14
27	22	17
28	12.5	25
29	15	20
30	14	16
31	12	17
32	18	13
33	7	7
