# Supplementary material for: Demography and predatory potential of Orius strigicollis on eggs of Plutella xylostella at two temperatures
Source: PeerJ. 2024 Oct 10;12:e18044. doi: 10.7717/peerj.18044 (PMC11471147; doi:10.7717/peerj.18044)
Supplement: Supplemental Information 2 [file peerj-12-18044-s002.xlsx]

## Sheet: 28 (Life table)
No	sex	Egg	N1	N2	N3	N4	N5	Adults	1	2	3	4	5	6	7	8	9	10	11	12	13	14	15	16	17	18	19	20	21	22	23	24	25
1	M	3	3	3	2	1	2	18
2	F	3	3	3	2	1	4	22	0	0	0	0	0	0	0	10	8	6	8	4	8	2	6	0	0	0	4	1	2	-1
3	F	3	3	3	3	2	3	20	0	0	0	12	13	4	2	0	0	10	2	0	0	4	0	0	0	0	0	1	-1
4	N	2	2	-3
5	N	2	-1
6	N	3	-1
7	F	3	2	3	4	1	2	17	0	0	0	0	12	8	2	0	3	1	0	5	1	6	3	1	0	-1
8	M	3	3	3	2	1	3	9
9	F	3	3	3	2	2	4	2	0	0	-1
10	N	2	-1
11	F	3	3	3	2	2	3	20	0	0	0	0	0	7	3	8	0	4	8	0	0	3	4	1	1	0	0	0	-1
12	M	3	3	3	2	2	4	10
13	N	3	-1
14	M	3	3	3	2	1	4	9
15	F	3	3	2	3	1	2	19	0	0	0	0	8	3	11	2	0	0	0	0	7	9	1	8	4	2	1	-1
16	N	3	-1
17	F	3	3	3	2	2	4	11	0	0	0	0	0	1	8	6	4	1	7	-1
18	M	3	3	4	2	2	3	6
19	N	3	2	3	2	2	-3
20	N	3	2	-3
21	N	3	3	3	2	1	-2
22	F	3	3	3	2	2	4	25	0	0	0	0	0	0	0	3	5	0	8	2	9	10	4	0	1	2	1	0	3	1	0	0	0	-1
23	N	2	-1
24	N	3	2	-4
25	N	3	-2
26	N	3	2	3	2	2	-4
27	N	3	2	3	-2
28	F	3	3	3	2	2	3	20	0	0	0	0	0	4	11	9	0	9	0	3	10	0	0	8	0	4	0	0	-1
29	N	3	3	3	3	-3
30	N	3	-1
31	N	3	-1
32	M	3	3	4	2	2	3	5
33	N	3	-1
34	N	2	2	3	-2
35	N	3	2	-4
36	M	3	3	4	2	2	3	12
37	N	2	2	-3
38	N	3	2	-3
39	M	3	3	4	2	2	3	4
40	N	2	-1

## Sheet: Daily Predation 
No.	N1	N1	N1	N2	N2	N2	N3	N3	N3		N4	N4	N5	N5	N5	N5
1	1	2	1	3	2	4	6	8			12		12	10
2	2	1	2	3	2	4	3	6			11		14	11	15	13
3	2	1	1	3	4	1	8	5	5		10	6	6	12
4	2	2	1	2	1	3
5
6
7	2	1		3	3	3	6	6	5	3	14		12	15
8	2	1		3	2	2	7	7			12		14	13	15	12
9	1	2		2	4	2	7	5			8	13	16	9	13	11	10
10
11	1	1	3	3	3	2	5	7			11	13	14	8	13
12	1	2		3	2	1	3	9			9	12	8	12	12	7
13
14	1	2		3	3	2	7	6			10		12	11	15	10	16
15	2	1	2	3	2		4	7	9		9		5	8
16
17	1	3	2	3	2	3	6	6			8	12	13	16	10	5
18	1	1	2	3	2	2	10	4			10	9	15	12	12	9
19	1	2		2	3	1	9	4			6	13	9	12
20	1	2		1	1
21	1	2	2	3	3	1	6	8			12		14
22	2	1	2	3	2	4	5	7			6	9	4	10	16	11
23
24	2	1	1	3	2	2
25	1
26	2	1		3	1	1	7	10			16	7	17	8	12
27	2	2		3	3	1	5
28	1	2	1	3	3	2	7	4			8	12	11	15	13
29	2	1	1	3	3	2	6	9	5		10	14
30
31
32	2	2	1	3	1	4	6	4	3		11	12	6	15	13
33
34	1	1		3	3	2	5
35	1	2	6	4	3
36	1	2		3	3	2	5	9			11	10	12	10	5	12	18
37	2	2		4	2
38	2	1		1	1
39	1	1	2	3	2	2	4	6			14	9	12	17	6
40

## Sheet: Male and female daily consumpti
	Days	1	2	3	4	5	6	7	8	9	10	11	12	13	14	15
1	Male	10	15	13	17	12	12	10	16	12	18	9	13
2	Male	12	12	12	6	9	2	8
3	Male	13	9	10	6	12	12	10	14	13
4	Male	12	12	12	11	12	12	14	8	12
5	Male	12	10	12	12	12	10
6	Male	10	4
7	Male	12	10	11	14	9	13	12	15	12	12	12	10
8	Male	7	14	12	12
	Days	1	2	3	4	5	6	7	8	9	10	11	12	13	14	15	16	17	18	19
17	Female	12	10	11	14	9	13	12	15	12	12	12	10
15	Female	10	15	13	17	12	12	10	16	12	18	9	13
13	Female	15	12	12	13	12	12	14	16	13	12	11	10	12
2	Female	10	15
14	Female	15	17	12	12	8	15	13	15	12	12	12	12	14	10
19	Female	16	12	13	14	18	13	14	12	12	13	10	12	12	11	10	9	10	17	11
6	Female	15	15	12	13	13	12
18	Female	14	10	19	13	12	17	22	10	13	12	12	12	10	4	15	11	12	12
15	Female	10	15	13	17	12	12	10	16	12	18	9	13	12	15	11	11
