# Supplementary material for: Demography and predatory potential of Orius strigicollis on eggs of Plutella xylostella at two temperatures
Source: PeerJ. 2024 Oct 10;12:e18044. doi: 10.7717/peerj.18044 (PMC11471147; doi:10.7717/peerj.18044)
Supplement: Supplemental Information 3 [file peerj-12-18044-s003.xlsx]

## Sheet: mena Predation
N1
Temparature		N	Mean	Std. Deviation	Std. Error Mean
Predation_rate	28 oC	37	1.75676	0.434959	0.0715068
	32 oc	34	1.23529	0.430562	0.0738407
N1
		Levene's Test for Equality of Variances		t-test for Equality of Means
		F	Sig.	t	df	Sig. (2-tailed)	Mean Difference	Std. Error Difference	95% Confidence Interval of the Difference
									Lower	Upper
Predation_rate	Equal variances assumed	0.023935	0.877502	5.07091	69	3.18367e-06	0.521463	0.102834	0.316314	0.726611
	Equal variances not assumed			5.07311	68.6073	3.18766e-06	0.521463	0.102789	0.316382	0.726543
N2
Temparature		N	Mean	Std. Deviation	Std. Error Mean
Predation_rate	28 oC	36	2.55556	0.606839	0.10114
	32 oc	21	2.33333	0.483046	0.105409
N2
		Levene's Test for Equality of Variances		t-test for Equality of Means
		F	Sig.	t	df	Sig. (2-tailed)	Mean Difference	Std. Error Difference	95% Confidence Interval of the Difference
									Lower	Upper
Predation_rate	Equal variances assumed	2.55535	0.115651	1.43247	55	0.157669	0.222222	0.155132	-0.08867	0.533114
	Equal variances not assumed			1.5212	49.7039	0.134546	0.222222	0.146083	-0.0712384	0.515683
N3
Temparature		N	Mean	Std. Deviation	Std. Error Mean
Predation_rate	28 oC	27	6.37037	1.04323	0.200769
	32 oc	17	4.88235	1.21873	0.295585
N3
		Levene's Test for Equality of Variances		t-test for Equality of Means
		F	Sig.	t	df	Sig. (2-tailed)	Mean Difference	Std. Error Difference	95% Confidence Interval of the Difference
									Lower	Upper
Predation_rate	Equal variances assumed	0.33758	0.564335	4.31675	42	9.44196e-05	1.48802	0.344708	0.792368	2.18367
	Equal variances not assumed			4.16437	30.2115	0.000240023	1.48802	0.357321	0.758485	2.21755
N4
Temparature		N	Mean	Std. Deviation	Std. Error Mean
Predation_rate	28 oC	27	11.1481	1.37851	0.265294
	32 oc	17	10.6471	2.9568	0.717129
N4
		Levene's Test for Equality of Variances		t-test for Equality of Means
		F	Sig.	t	df	Sig. (2-tailed)	Mean Difference	Std. Error Difference	95% Confidence Interval of the Difference
									Lower	Upper
Predation_rate	Equal variances assumed	7.46924	0.00914448	0.762353	42	0.45011	0.501089	0.657293	-0.825381	1.82756
	Equal variances not assumed			0.655338	20.4434	0.519557	0.501089	0.764627	-1.09168	2.09386
N5
Temparature		N	Mean	Std. Deviation	Std. Error Mean
Predation_rate	28 oC	13	12.0769	1.44115	0.399704
	32 oc	17	11.4706	1.80685	0.438225
N5
		Levene's Test for Equality of Variances		t-test for Equality of Means
		F	Sig.	t	df	Sig. (2-tailed)	Mean Difference	Std. Error Difference	95% Confidence Interval of the Difference
									Lower	Upper
Predation_rate	Equal variances assumed	0.348182	0.559877	0.991369	28	0.329996	0.606335	0.611613	-0.646498	1.85917
	Equal variances not assumed			1.02226	27.9255	0.315432	0.606335	0.593131	-0.608786	1.82146
Adults
temperature		N	Mean	Std. Deviation	Std. Error Mean
Predation_rate	28 oC	31	12.129	1.40812	0.252905
	32 oC	33	14.9697	3.30232	0.57486
Adults
		Levene's Test for Equality of Variances		t-test for Equality of Means
		F	Sig.	t	df	Sig. (2-tailed)	Mean Difference	Std. Error Difference	95% Confidence Interval of the Difference
									Lower	Upper
Predation_rate	Equal variances assumed	6.52875	0.0130823	-4.42479	62	3.97896e-05	-2.84066	0.641989	-4.12398	-1.55735
	Equal variances not assumed			-4.52312	43.8344	4.60137e-05	-2.84066	0.628033	-4.10652	-1.57481

## Sheet: Total predation 
N1
Temparature		N	Mean	Std. Deviation	Std. Error Mean
Predation_rate	28 oC	40	2.7	1.84252	0.291328
	32 oc	26	2.11538	0.515901	0.101177
N1
		Levene's Test for Equality of Variances		t-test for Equality of Means
		F	Sig.	t	df	Sig. (2-tailed)	Mean Difference	Std. Error Difference	95% Confidence Interval of the Difference
									Lower	Upper
Predation_rate	Equal variances assumed	37.8447	5.56333e-08	1.57439	64	0.120327	0.584615	0.371327	-0.157196	1.32643
	Equal variances not assumed			1.89566	47.8884	0.0640485	0.584615	0.308397	-0.0354949	1.20473
N2
Temparature		N	Mean	Std. Deviation	Std. Error Mean
Predation_rate	28 oC	40	4.825	3.58692	0.567143
	32 oc	21	5.80952	1.83355	0.400113
N2
		Levene's Test for Equality of Variances		t-test for Equality of Means
		F	Sig.	t	df	Sig. (2-tailed)	Mean Difference	Std. Error Difference	95% Confidence Interval of the Difference
									Lower	Upper
Predation_rate	Equal variances assumed	27.2624	2.42068e-06	-1.17643	59	0.244148	-0.984524	0.836875	-2.65911	0.690058
	Equal variances not assumed			-1.41847	58.9883	0.161316	-0.984524	0.694076	-2.37337	0.404325
N3
Temparature		N	Mean	Std. Deviation	Std. Error Mean
Predation_rate	28 oC	39	7.79487	7.25904	1.16238
	32 oc	17	10.8235	3.3955	0.823529
N3
		Levene's Test for Equality of Variances		t-test for Equality of Means
		F	Sig.	t	df	Sig. (2-tailed)	Mean Difference	Std. Error Difference	95% Confidence Interval of the Difference
									Lower	Upper
Predation_rate	Equal variances assumed	33.2616	4.01573e-07	-1.63758	54	0.107324	-3.02866	1.84947	-6.73663	0.679311
	Equal variances not assumed			-2.12606	53.6304	0.0381189	-3.02866	1.42454	-5.88514	-0.172172
N4
Temparature		N	Mean	Std. Deviation	Std. Error Mean
Predation_rate	28 oC	21	17.5714	5.05541	1.10318
	32 oc	15	15.4667	6.83339	1.76437
N4
		Levene's Test for Equality of Variances		t-test for Equality of Means
		F	Sig.	t	df	Sig. (2-tailed)	Mean Difference	Std. Error Difference	95% Confidence Interval of the Difference
									Lower	Upper
Predation_rate	Equal variances assumed	0.123708	0.727218	1.06367	34	0.294975	2.10476	1.97877	-1.91659	6.12612
	Equal variances not assumed			1.01148	24.4683	0.321684	2.10476	2.08087	-2.1856	6.39512
N5
Temparature		N	Mean	Std. Deviation	Std. Error Mean
Predation_rate	28 oC	20	36.3	10.2243	2.28623
	32 oc	12	25.75	9.68715	2.79644
N5
		Levene's Test for Equality of Variances		t-test for Equality of Means
		F	Sig.	t	df	Sig. (2-tailed)	Mean Difference	Std. Error Difference	95% Confidence Interval of the Difference
									Lower	Upper
Predation_rate	Equal variances assumed	0.0387426	0.845287	2.88039	30	0.00726443	10.55	3.66269	3.06978	18.0302
	Equal variances not assumed			2.92078	24.3268	0.00742205	10.55	3.61205	3.10039	17.9996
Adults
Temparature		N	Mean	Std. Deviation	Std. Error Mean
Predation_rate	28 oC	31	68.1613	32.4829	5.8341
	32 oc	33	45.9091	29.4887	5.13333
Adults
		Levene's Test for Equality of Variances		t-test for Equality of Means
		F	Sig.	t	df	Sig. (2-tailed)	Mean Difference	Std. Error Difference	95% Confidence Interval of the Difference
									Lower	Upper
Predation_rate	Equal variances assumed	1.63283	0.206076	2.87229	62	0.00557164	22.2522	7.74721	6.76575	37.7386
	Equal variances not assumed			2.86351	60.4597	0.0057512	22.2522	7.77096	6.71039	37.794
