# Supplementary material for: Demography and predatory potential of Orius strigicollis on eggs of Plutella xylostella at two temperatures
Source: PeerJ. 2024 Oct 10;12:e18044. doi: 10.7717/peerj.18044 (PMC11471147; doi:10.7717/peerj.18044)
Supplement: Supplemental Information 4 [file peerj-12-18044-s004.xlsx]

## Sheet: Daily total comp at 28 and 32
	N1		N2		N3		N4		N5		Adult
Rep	28	23	28	32	28	32	28	32	28	32	28	32
1	4	2	9	5	14	14	12	12	22	46	88	103
2	5	2	9	4	9	13	11	35	53	13	86	97
3	4	2	8	6	18	11	16	21	32	35	82	92
4	5	2	3	7	0	8	14	10	27	21	78	50
5	0	2	0	8	0	12	12	13	42	36	66	47
6	0	1	0	5	0	17	21	14	49	26	61	58
7	3	2	9	8	20	9	24	16	35	20	54	58
8	3	2	7	9	14	11	21	13	39	22	53	66
9	3	2	8	7	12	14	10	13	48	20	49	32
10	0	2	0	3	0	8	9	20	48	14	30	14
11	5	2	8	6	12	11	20	10	44	31	21	17
12	3	3	6	7	12	11	19	22	39	25	23	25
13	0	2	0	4	0	12	19	15	21		117	20
14	3	2	8	6	13	9	12	8	14		121	16
15	5	2	5	4	20	2	15	10	41		105	103
16	0	2	0	4	0	8	23		37		113	13
17	1	2	8	7	12	14	20		39		96	45
18	4	3	7	8	14		24		34		106	41
19	3	3	6	2	13		23		27		95	37
20	3	3	2	6	0		21		35		100	42
21	5	1	7	6	14		23				86	36
22	5	3	9		12						97	103
23	0	2	0		0						75	44
24	4	2	7		0						82	46
25	1	2	0		0						60	43
26	3	2	5		17						40	32
27	4		7		5						36	103
28	4		8		11						31	25
29	4		8		20						22	30
30	0		0		0						29	28
31	0		0		0						11	24
32	5		8		13							18
33	0		0		0							7
34	2		8		5
35	3		0		0
36	3		8		14
37	4		6		0
38	3		2		0
39	4		7		10
40	0		0
	2.7	2.11538	4.825	5.80952	7.79487	10.8235	17.5714	15.4667	36.3	25.75	68.1613	45.9091

## Sheet: Sheet1
	N1 total									N2 total
Statistix 8.1 12/5/2019, 9:44:10 PM									Statistix 8.1 12/5/2019, 9:46:06 PM
Tukey HSD All-Pairwise Comparisons Test									Tukey HSD All-Pairwise Comparisons Test
Variable Mean Homogeneous Groups									Variable Mean Homogeneous Groups
a 2.7000 A									b 5.8095 A
b 2.1154 A									a 4.8250 A
Alpha 0.05									Alpha 0.05
Critical Q Value 2.824									Critical Q Value 2.829
There are no significant pairwise differences among the means.									There are no significant pairwise differences among the means.
	N3 total									N4 total
Statistix 8.1 12/5/2019, 9:48:12 PM									Statistix 8.1 12/5/2019, 9:51:27 PM
Tukey HSD All-Pairwise Comparisons Test									Tukey HSD All-Pairwise Comparisons Test
Variable Mean Homogeneous Groups									Variable Mean Homogeneous Groups
b 10.824 A									a 17.571 A
a 7.7949 A									b 15.467 A
Alpha 0.05									Alpha 0.05
Critical Q Value 2.834									Critical Q Value 2.870
There are no significant pairwise differences among the means.									There are no significant pairwise differences among the means.
	N5 total
Statistix 8.1 12/5/2019, 9:53:04 PM
Tukey HSD All-Pairwise Comparisons Test
Variable Mean Homogeneous Groups
a 36.300 A
b 25.750 B
Alpha 0.05
Critical Q Value 2.884
All 2 means are significantly different from one another.
