# Supplementary material for: Demography and predatory potential of Orius strigicollis on eggs of Plutella xylostella at two temperatures
Source: PeerJ. 2024 Oct 10;12:e18044. doi: 10.7717/peerj.18044 (PMC11471147; doi:10.7717/peerj.18044)
Supplement: Supplemental Information 5 [file peerj-12-18044-s005.xlsx]

## Sheet: 32 (Life table data)
No	sex	Egg	N1	N2	N3	N4	N5	Adults	1	2	3	4	5	6	7	8	9	10	11	12	13	14	15	16	17	18	19	20
1	M	2	2	2	3	1	3	16
2	M	2	2	2	3	3	1	1
3	F	2	2	3	2	2	3	10	0	0	0	3	7	1	5	0	3	5	-1
4	F	2	2	3	2	1	2	3	0	0	0	-1
5	N	3	2	3	3	-2
6	N	3	2	2	3	2	-1
7	M	2	2	3	2	2	3	2
8	M	2	2	3	2	2	2	8
9	M	2	2	3	2	2	2	6
10	N	3	2	-2
11	M	3	2	3	2	2	2	9
12	F	2	2	3	2	1	2	12	0	0	4	3	9	4	0	2	5	0	0	0	-1
13	N	2	-1
14	N	3	2	1	2	2	-3
15	N	3	2	-1
16	N	2	2	-1
17	N	3	2	-1
18	N	3	2	-1
19	M	3	2	3	3	1	3	9
20	N	2	2	2	-1
21	N	3	2	2	2	-2
22	N	3	2	3	-2
23	N	3	2	3	2	1	-3
24	N	3	2	-1
25	N	3	2	3	3	-1
26	N	3	2	3	-1
27	N	2	-2
28	N	2	-1
29	N	2	-1
30	N	3	-1
31	N	2	-1
32	N	2	-1
33	N	2	-1
34	N	2	-1
35	N	2	-1
36	N	2	-1
37	N	2	-1
38	N	2	-1
39	N	2	-1
40	N	2	-1

## Sheet: Daily Predation
No	N1	N1	N2	N2	N2	N3	N3	N3	N4	N4	N5	N5	N5
1	1	1	2	3		6	4	4	12		15	11	20
2	1	1	2	2		3	5	5	15	20	13
3	1	1	2	1	3	7	4		9	12	9	16	10
4	1	1	1	3	3	4	4		10		16	5
5	1	1	2	2	4	5	3	4	13
6		1	3	2		5	5	7	6	8
7	1	1	3	2	3	6	3		6	10	13	12	11
8	1	1	3	2	4	5	6		7	6	15	11
9	1	1	3	2	2	7	7		8	5	9	11
10	1	1	3
11	1	1	1	2	3	5	3		11	9	12	10
12	2	1	2	4	1	7	4		10		12	8
13	1	1	2	2
14	1	1				9	2		7	15	4	10
15	1	1
16	1	1
17	1	1
18	2	1
19	2	1	2	2	2	5	5	2	15		13	8	10
20	1	2	2	2
21		1	2	2		4	5		8
22	2	1	2	2	3	2
23	1	1	2	3	3	3	5		10		15	10
24	1	1		2
25	1	1	2	2	2	4	4	6
26	1	1	2	2	2

## Sheet: Male & female daily predation
Sr. No	Days	1	2	3	4	5	6	7	8	9	10	11	12	13	14	15	16	17	18	19	20			Sr. No	1	2	3	4	5	6	7							1	2	3
1	Male	20	18	22	15	12	12	16	22	10	14	17	25	20	16	17	13							Days	Male	Male	Male	Male	Male	Male	Male	mean	sum					Female	Female	Female	mean	sum
2	Male	12																						1	20	12	20	17	10	14	10	14.7143	103					15	20	10	15	45
3	Male	20	8																					2	18		8	24	17	16	14	16.1667	97					10	19	12	13.6667	41
4	Male	17	24	22	12	6	15	12	12															3	22			22	13	22	13	18.4	92					10	15	12	12.3333	37
5	Male	10	17	13																				4	15			12		10	13	12.5	50					12	18	12	14	42
6	Male	14	16	22	10	16	23	12	12	15														5	12			6		16	13	11.75	47					12	12	12	12	36
7	Male	10	14	13	13	13	8	18	20	7														6	12			15		23	8	14.5	58					12	12	12	12	36
																								9	10					15	7	10.6667	32					14	14	15	14.3333	43
																								10	14							14	14					12		20	16	32
																								11	17							17	17					22		22	22	44
																								12	25							25	25					15		10	12.5	25
1	Female	15	10	10	12	12	12	12	19	14	12	22	15	15	15	10	18	7						13	20							20	20					15		15	15	30
2	Female	20	19	15	18	12	12	18	14	14														14	16							16	16					15		13	14	28
3	Female	10	12	12	12	12	12	14	13	15	20	22	10	15	13	14								15	17							17	17					10		14	12	24
																								18
																								19
																								20
